# Supplementary material
Source: publisher figshare collection journal article supplement (https://asha.figshare.com/articles/dataset/_/24207864)
Supplement: Supplementary file 2 [file 1]

**Supplemental Material S1.** Descriptive data on primary and secondary outcomes for all participants.

| Outcome                                     | Pre           |          | +3 months     |          | +6 months     |          | +12 months    |          |
|---------------------------------------------|---------------|----------|---------------|----------|---------------|----------|---------------|----------|
|                                             | <i>M (SD)</i> | <i>n</i> |
| Impact of stuttering: <i>OASES-S</i>        |               | 62       |               | 57       |               | 55       |               | 50       |
| Total Score                                 | 2.40 (0.52)   |          | 2.14 (0.54)   |          | 2.02 (0.48)   |          | 1.94 (0.45)   |          |
| General Information                         | 3.17 (0.51)   |          | 1.94 (0.72)   |          | 2.56 (0.52)   |          | 2.50 (0.48)   |          |
| Reactions to Stuttering                     | 2.27 (0.77)   |          | 2.05 (0.73)   |          | 1.92 (0.59)   |          | 1.83 (0.59)   |          |
| Communication in Daily Situations           | 2.01 (0.60)   |          | 1.94 (0.72)   |          | 1.74 (0.52)   |          | 1.74 (0.55)   |          |
| Quality of Life                             | 2.15 (0.88)   |          | 1.74 (0.72)   |          | 1.65 (0.63)   |          | 1.64 (0.59)   |          |
| Subjective Parental Rating                  |               | 62       |               | 57       |               | 55       |               | 51       |
| Subjective Stuttering Severity              | 4.53 (1.94)   |          | 4.11 (2.00)   |          | 3.42 (1.96)   |          | 3.53 (2.30)   |          |
| Satisfaction with communication             | 7.37 (1.81)   |          | 7.68 (2.04)   |          | 7.93 (1.35)   |          | 8.37 (1.20)   |          |
| Objective stuttering severity: <i>SSI-4</i> |               |          |               |          |               |          |               |          |
| Total                                       | 16.44 (8.21)  | 61       | 14.85         | 52       | 14.77         | 52       | 14.26 (7.24)  | 50       |
| Frequency Spontaneous Speech (%)            | 4.80 (4.49)   | 62       | (7.80)        | 57       | (7.80)        | 55       | 3.64 (4.01)   | 50       |
| Frequency Reading (%)                       | 2.80 (4.61)   | 44       | 3.83 (4.03)   | 44       | 3.40 (4.29)   | 44       | 1.53 (2.83)   | 43       |
| Duration Spontaneous Speech                 | 1.41 (0.71)   | 60       | 1.35 (1.85)   | 57       | 1.54 (2.38)   | 55       | 1.40 (0.73)   | 50       |
| Duration Reading                            | 0.87 (0.71)   | 44       | 1.32 (0.69)   | 44       | 1.41 (0.91)   | 43       | 0.63 (0.79)   | 43       |
| Physical Concomitants Spontaneous Speech    | 2.70 (2.96)   | 61       | 0.61 (0.69)   | 54       | 0.95 (1.00)   | 51       | 2.06 (2.17)   | 50       |
| Physical Concomitants Reading               | 1.42 (2.38)   | 43       | 2.52 (2.94)   | 44       | 2.29 (2.34)   | 39       | 0.52 (1.25)   | 42       |
| Physical Concomitants Reading               |               |          | 0.70 (1.45)   |          | 0.74 (1.63)   |          |               |          |
| Beyond clinic samples                       |               |          |               |          |               |          |               |          |
| Related adult – Frequency (%)               | 3.46 (2.69)   | 38       | 2.49 (2.08)   | 34       | 2.97 (3.24)   | 35       | 2.67 (2.40)   | 26       |
| Related adult - Duration                    | 1.11 (0.63)   |          | 1.14 (0.72)   |          | 1.17 (0.76)   |          | 1.08 (0.54)   |          |
| Nonrelated adult – Frequency (%)            | 12.33 (37.3)  | 28       | 4.34 (3.71)   | 16       | 2.37 (1.89)   | 18       | 10.1 (25.2)   | 11       |
| Nonrelated adult - Duration                 | 1.44 (0.95)   |          | 1.17 (0.92)   |          | 1.05 (0.68)   |          | 1.38 (1.71)   |          |
