# Supplementary material
Source: publisher figshare collection journal article supplement (https://asha.figshare.com/articles/dataset/_/24207864)
Supplement: Supplementary file 3 [file 1]

## Supplemental Material S5. Description of the therapy program *KIDS*.

The therapy program School-*KIDS* (Kinder Dürfen Stottern, "Children are allowed to stutter") targets school-age children between 7-12 years who stutter. It was developed for outpatient individual therapy with 1-2 therapy sessions per week. In Germany, up to 50 sessions of 45 minutes are covered by the health insurance. The authors Sandrieser and Schneider recommend 1-2 treatment sessions per week. The therapy consists of 5 treatment phases which may, but need not, be applied in chronological order (see also Therapy Principles):

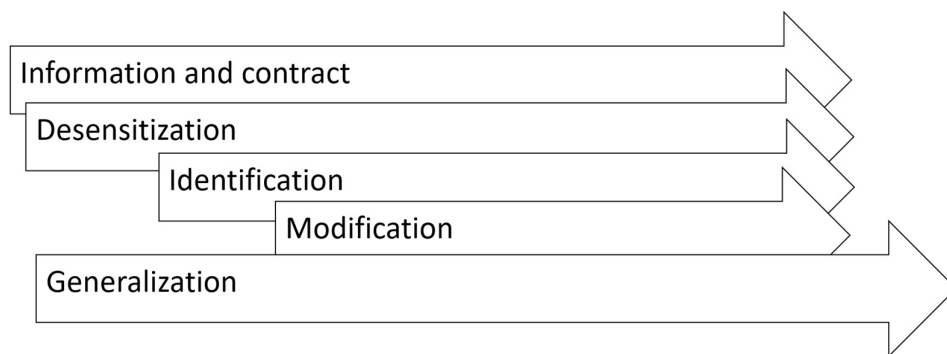

| Phase                           | Prerequisites                                                                                                                                       | Goals                                                                                                                                                                                                                                                                                                                                                                                                                                                                                                                                                                       | Components and Interventions                                                                                                                                                                                                                                                                                                                                                                                                                                                                                                                                                                                                                                                                                           |
|---------------------------------|-----------------------------------------------------------------------------------------------------------------------------------------------------|-----------------------------------------------------------------------------------------------------------------------------------------------------------------------------------------------------------------------------------------------------------------------------------------------------------------------------------------------------------------------------------------------------------------------------------------------------------------------------------------------------------------------------------------------------------------------------|------------------------------------------------------------------------------------------------------------------------------------------------------------------------------------------------------------------------------------------------------------------------------------------------------------------------------------------------------------------------------------------------------------------------------------------------------------------------------------------------------------------------------------------------------------------------------------------------------------------------------------------------------------------------------------------------------------------------|
| <b>Information and Contract</b> | <ul style="list-style-type: none"> <li>- stuttering treatment is warranted</li> <li>- caregivers have agreed to participate in treatment</li> </ul> | <ol style="list-style-type: none"> <li>1. To inform parents about the findings of the assessment, the therapy concept and the goals of <i>KIDS</i>.</li> <li>2. To inform the child has been informed about stuttering, the therapy concept and the general goals of <i>KIDS</i>.</li> <li>3. To clarify the therapy mandate from parents and child to the clinician</li> <li>4. To identify all parental concerns.</li> <li>5. To complet a triangular contract with individualized, realistic goals, concrete procedures and distribution of responsibilities.</li> </ol> | <ol style="list-style-type: none"> <li>1. Education of parents and contract <ul style="list-style-type: none"> <li>- information about the consequences of not starting therapy as well as trustworthy, available therapy methods</li> <li>- information about the structural conditions (e.g., insurance coverage, waiting times)</li> <li>- Contracting: clarification of the roles of all parties involved and reflection on their own behavior → agreements on <ol style="list-style-type: none"> <li>1) structure (e.g., place, frequency, scheduling, costs of the therapy)</li> <li>2) process (e.g., methods, type of cooperation, exchange of information during therapy).</li> </ol> </li> </ul> </li> </ol> |

|                        |                                                                                                                                                                                         |                                                                                                                                                                                                                                                                                                                                                                                                                                                                                                                                                                                                                                                                                                                                                                                           |                                                                                                                                                                                                                                                                                                                                                                                                                                                                                                                                                                                                                                                                                                                                                                                                                                                                                                                                                                                                                                                                               |
|------------------------|-----------------------------------------------------------------------------------------------------------------------------------------------------------------------------------------|-------------------------------------------------------------------------------------------------------------------------------------------------------------------------------------------------------------------------------------------------------------------------------------------------------------------------------------------------------------------------------------------------------------------------------------------------------------------------------------------------------------------------------------------------------------------------------------------------------------------------------------------------------------------------------------------------------------------------------------------------------------------------------------------|-------------------------------------------------------------------------------------------------------------------------------------------------------------------------------------------------------------------------------------------------------------------------------------------------------------------------------------------------------------------------------------------------------------------------------------------------------------------------------------------------------------------------------------------------------------------------------------------------------------------------------------------------------------------------------------------------------------------------------------------------------------------------------------------------------------------------------------------------------------------------------------------------------------------------------------------------------------------------------------------------------------------------------------------------------------------------------|
|                        |                                                                                                                                                                                         |                                                                                                                                                                                                                                                                                                                                                                                                                                                                                                                                                                                                                                                                                                                                                                                           | <p>3) responsibilities of the parties involved (mostly child, parents, and clinician)</p> <p>2. Education of the child and contract</p> <ul style="list-style-type: none"> <li>- basic education on stuttering</li> <li>- clarification of the child's goals for treatment</li> <li>- parent(s), child and clinician conclude a written and/or visualized therapy contract</li> </ul>                                                                                                                                                                                                                                                                                                                                                                                                                                                                                                                                                                                                                                                                                         |
|                        |                                                                                                                                                                                         |                                                                                                                                                                                                                                                                                                                                                                                                                                                                                                                                                                                                                                                                                                                                                                                           | <p>The contract is continuously re-evaluated and adapted (if necessary) during the course of treatment.</p>                                                                                                                                                                                                                                                                                                                                                                                                                                                                                                                                                                                                                                                                                                                                                                                                                                                                                                                                                                   |
| <b>Desensitization</b> | <ul style="list-style-type: none"> <li>- triangular contract has been completed</li> <li>- parents have been informed that core symptoms may increase during desensitization</li> </ul> | <ol style="list-style-type: none"> <li>1. The child and parents react neutrally toward stuttering symptoms.</li> <li>2. The child can name, imitate, and explain own stuttering core behaviors.</li> <li>3. Avoidance behavior is notably reduced.</li> <li>4. In most situations, the child is able to pseudo-stutter calmly.</li> <li>5. The child is ready to speak out and inform others about stuttering.</li> <li>6. The child can appropriately reflect upon annoying or derogatory listener reactions and usually responds adequately.</li> <li>7. The child largely controls stuttering-related feelings of fear and expects to be able to cope with communication situations.</li> <li>8. The child largely gains a feeling of control over stuttering and speaking.</li> </ol> | <ol style="list-style-type: none"> <li>1. Taboo eradication <ul style="list-style-type: none"> <li>- detailed information about the symptomatology, causation and neurophysiology of stuttering and existing prejudices</li> <li>- applying this knowledge to the analysis of others' stuttering, imitated stuttering, and if interested, one's own stuttering</li> <li>- in-depth analysis of the school situation with the child</li> </ul> </li> <li>2. Desensitization toward the symptoms <ul style="list-style-type: none"> <li>- the child learns pseudo-stuttering (purposeful tension-free part-word repetitions) → beginning with sentence-level up to in vivo desensitization (linguistic and situational complexity is gradually increased)</li> <li>- principle of systematic desensitization is taught → child develops a personal desensitization hierarchy and undertakes "courage tests" with pseudo-stuttering in and outside the therapy room</li> <li>- the entire family is invited and informed about stuttering and the therapy</li> </ul> </li> </ol> |

|                       |                                                      |                                                                                                                                                                                                                                                                                                                                                                                                                                                                                                                                                                                                                                                                                                                  |                                                                                                                                                                                                                                                                                                                                                                                                                                                                                                                                                                                                                                                                                                                                                                                                                                                                                                                                                                                                                                                                                                                                                                                                                                                                                              |
|-----------------------|------------------------------------------------------|------------------------------------------------------------------------------------------------------------------------------------------------------------------------------------------------------------------------------------------------------------------------------------------------------------------------------------------------------------------------------------------------------------------------------------------------------------------------------------------------------------------------------------------------------------------------------------------------------------------------------------------------------------------------------------------------------------------|----------------------------------------------------------------------------------------------------------------------------------------------------------------------------------------------------------------------------------------------------------------------------------------------------------------------------------------------------------------------------------------------------------------------------------------------------------------------------------------------------------------------------------------------------------------------------------------------------------------------------------------------------------------------------------------------------------------------------------------------------------------------------------------------------------------------------------------------------------------------------------------------------------------------------------------------------------------------------------------------------------------------------------------------------------------------------------------------------------------------------------------------------------------------------------------------------------------------------------------------------------------------------------------------|
|                       |                                                      | <ul style="list-style-type: none"> <li>- school event on stuttering is planned and carried out in the later course of therapy</li> </ul>                                                                                                                                                                                                                                                                                                                                                                                                                                                                                                                                                                         |                                                                                                                                                                                                                                                                                                                                                                                                                                                                                                                                                                                                                                                                                                                                                                                                                                                                                                                                                                                                                                                                                                                                                                                                                                                                                              |
|                       |                                                      | 3. Desensitization toward listeners' reactions                                                                                                                                                                                                                                                                                                                                                                                                                                                                                                                                                                                                                                                                   | <ul style="list-style-type: none"> <li>- use of open stuttering (core symptoms without secondary behavior)</li> <li>- hierarchical in vivo desensitization to listener reactions</li> </ul>                                                                                                                                                                                                                                                                                                                                                                                                                                                                                                                                                                                                                                                                                                                                                                                                                                                                                                                                                                                                                                                                                                  |
| <b>Identification</b> | - the child appears ready to deal with real symptoms | <ol style="list-style-type: none"> <li>1. The child can perceive, imitate, vary and describe own stuttering symptoms with regard to type, duration, affected word/sound, articulatory properties, accompanying behavior, avoidance behavior and emotional responses.</li> <li>2. The child is able to monitor own symptoms during running speech.</li> <li>3. The child is able to stop speaking during symptoms.</li> <li>4. The child is able to identify and talk about own emotions related to speaking and stuttering.</li> <li>5. The child shows predominantly open stuttering and can tolerate negative emotions.</li> <li>6. The child is aware of own avoidance behavior and can reduce it.</li> </ol> | <ol style="list-style-type: none"> <li>1. Articulatory phonetics <ul style="list-style-type: none"> <li>- the child is taught the basics of perception, conscious control and description of (fluent and stuttered) speech production</li> </ul> </li> <li>2. Analysis of symptoms <ul style="list-style-type: none"> <li>- articulatory phonetics is used to analyze stuttering symptoms (real and imitated stuttering events) <ul style="list-style-type: none"> <li>→ attention is paid to the quality of symptoms</li> <li>→ individual core symptoms are investigated with regard to affected word/syllable, length, secondary behaviors, and possible accompanying feelings and thoughts</li> <li>→ identification of avoidance behavior, thoughts and feelings related to speaking and stuttering</li> </ul> </li> </ul> </li> <li>3. Symptom registration ('monitoring') <ul style="list-style-type: none"> <li>- the child is trained to direct attention and register stuttering moments immediately → prerequisite for successful use of modification techniques</li> <li>- the child registers as many stuttering moments as possible in situations with linguistically increasing demands → a) in running speech of others, b) in the child's own speech</li> </ul> </li> </ol> |

|                       |                                                                                                                                                                                          |                                                                                                                                                                                                                                                                                                                                                                                                                                                                                                                                                                                                                                                                                                                                                                                                                             |                                                                                                                                                                                                                                                                                                                                                                                                                                                                                                                                                                                                                                                                                                                                                                                                                                                                                                                                                |
|-----------------------|------------------------------------------------------------------------------------------------------------------------------------------------------------------------------------------|-----------------------------------------------------------------------------------------------------------------------------------------------------------------------------------------------------------------------------------------------------------------------------------------------------------------------------------------------------------------------------------------------------------------------------------------------------------------------------------------------------------------------------------------------------------------------------------------------------------------------------------------------------------------------------------------------------------------------------------------------------------------------------------------------------------------------------|------------------------------------------------------------------------------------------------------------------------------------------------------------------------------------------------------------------------------------------------------------------------------------------------------------------------------------------------------------------------------------------------------------------------------------------------------------------------------------------------------------------------------------------------------------------------------------------------------------------------------------------------------------------------------------------------------------------------------------------------------------------------------------------------------------------------------------------------------------------------------------------------------------------------------------------------|
| <b>Modification</b>   | <ul style="list-style-type: none"> <li>- the child can describe the type and quality of own stuttering symptoms</li> <li>- the child can (mostly) calmly analyze own symptoms</li> </ul> | <ol style="list-style-type: none"> <li>1. The child applies the modification techniques with confidence, without having to pay much attention to the process and its correct realization.</li> <li>2. The child can judge the quality of applying the modification techniques without any help, and is able to find out the sources of mistakes and correct them in daily life.</li> <li>3. The child can apply the modification techniques confidently in stressful situations.</li> <li>4. The child stands by the fact that the modification techniques are effective.</li> <li>5. The child can decide against the use of modification techniques in situations where it seems to be more comfortable to stutter openly.</li> <li>6. The child accepts that the techniques may fail in stressful situations.</li> </ol> | <ol style="list-style-type: none"> <li>1. prolongation (preparatory set, Van Riper, 2006) for the prevention of a symptom <ul style="list-style-type: none"> <li>- initial practice by imitation of meaningless syllables in slow motion</li> <li>- practice of prolongations in words, sentences, etc. (linguistic hierarchy)</li> <li>- analysis of own prolongations and learning to correct them</li> <li>- desensitization towards use of prolongations in everyday situations</li> </ul> </li> <li>2. pullout (Van Riper, 2006), to resolve a symptom <ul style="list-style-type: none"> <li>- initial practice of stopping and freezing within a core symptom</li> <li>- practice of pullouts in pseudo symptoms with increasing linguistic demands</li> <li>- practice of pullouts in real symptoms with increasing situational demands</li> <li>- desensitization toward use of pullout in everyday situations</li> </ul> </li> </ol> |
| <b>Generalization</b> | <ul style="list-style-type: none"> <li>- the child masters speech techniques and other skills within the therapy setting</li> </ul>                                                      | <ol style="list-style-type: none"> <li>1. The child transfers acquired skills (e.g., speech techniques, pseudo-stuttering) to many areas of life.</li> <li>2. The child is prepared for the end of therapy.</li> <li>3. At the end of therapy, the child feels competent to manage stuttering symptoms and speech-related anxiety.</li> </ol>                                                                                                                                                                                                                                                                                                                                                                                                                                                                               | <ol style="list-style-type: none"> <li>1. Generalization outside the therapy setting <ul style="list-style-type: none"> <li>- practice of acquired skills in everyday communication situations (outside the therapy setting)</li> </ul> </li> <li>2. Generalization at the final stage of therapy <ul style="list-style-type: none"> <li>- strengthening the child's own initiative and responsibility to continue training skills</li> <li>- problem-solving for individual challenges</li> </ul> </li> <li>3. End of therapy and follow-up <ul style="list-style-type: none"> <li>- intervals between therapy sessions are stretched out</li> <li>- maintenance of skills</li> <li>- making a video of one's own skills in case of a relapse</li> </ul> </li> </ol>                                                                                                                                                                          |

If necessary, a framework therapy can supplement the phases of *KIDS* in individual cases. Framework therapy refers to all strategies that go beyond the core elements described here. In cases, where a child who stutters lacks relevant skills or competencies, these may be trained as a prerequisite for another intervention (e.g., divided attention to be able to use modification techniques efficiently or social competency to be able to stutter openly in conversation with others).

| Therapy Principles               | Description                                                                                                                                                                                                                                                                                                                                                                                                                                                                                                                                                                                                                                                                                                       |
|----------------------------------|-------------------------------------------------------------------------------------------------------------------------------------------------------------------------------------------------------------------------------------------------------------------------------------------------------------------------------------------------------------------------------------------------------------------------------------------------------------------------------------------------------------------------------------------------------------------------------------------------------------------------------------------------------------------------------------------------------------------|
| Tailored therapy                 | <ul style="list-style-type: none"> <li>- adaption of the treatment to the individual's needs and the treatment progress →shortening, postponing or intensifying phases</li> <li>- obligatory phases: information and contract, identification, desensitization, generalization, and follow-up care</li> <li>- modification phase may be omitted if symptoms occur rarely in everyday life, are short and without associated struggle behaviors</li> <li>- clinicians apply clinical reasoning and monitor effects</li> <li>- generally, the level (linguistic and situational) demands of the communication tasks is carefully varied in relation to the child's current abilities and learning goals.</li> </ul> |
| Strengthening child's resilience | <ul style="list-style-type: none"> <li>- <i>KIDS</i> targets the child's self-efficacy and communicative competence in a supportive social network</li> <li>- the clinician must demonstrate               <ol style="list-style-type: none"> <li>1) antithetical behavior → beliefs (antitheses) of the clinician differ from those of the client (theses), e.g. a positive, curious attitude toward stuttering is antithetical to negative evaluation and avoidance of the child (thesis)</li> <li>2) and allow stuttering → clinician shows understanding of all motives of the child, including fear of embarrassment or shame, and dysfunctional behaviors such as avoidance</li> </ol> </li> </ul>          |
| Child reference                  | <ul style="list-style-type: none"> <li>- establishment of a trusting relationship by listening carefully, observing closely, and consulting continuously (contracting)</li> <li>- child-friendly metaphors and exercises</li> <li>- small-step practice structure</li> <li>- individual reinforcement</li> </ul>                                                                                                                                                                                                                                                                                                                                                                                                  |
| Everyday life reference          | <ul style="list-style-type: none"> <li>- early preparation of transfer to everyday life and independence from the clinicians through in vivo work and homework</li> <li>- as often as possible, practice takes place outside the therapy room</li> <li>- supportive environmental conditions are established by involving family and friends in the therapy</li> <li>- child and parents are interviewed about the school situation; school visit with the child to establish the support of teachers and classmates</li> </ul>                                                                                                                                                                                   |

## References

- Sandrieser, P., & Schneider, P. (2015). *Stottern im Kindesalter* (4. Aufl.). Thieme.
- Schneider, P., & Sandrieser, P. (2018). *Therapiemanual Schul-KIDS*. Münster.
- Schneider, P., & Kohmäscher, A. (2022). *Schul-KIDS: Manual zur Therapie stotternder Schulkinder*. Natke.
- Schneider, P., Kohmaescher, A., & Sandrieser, P. (2023). KIDS: A Modification Approach in Stuttering Therapy for School Children. In H. Sønsterud & K. Wesierska (Eds.), *Dialogue without barriers: Comprehensive intervention in stuttering* (pp. 195–229). Agere Aude. <https://www.logolab.edu.pl/wp-content/uploads/2023/06/Chapter-7-.pdf>
