# Supplementary material
Source: publisher figshare collection journal article supplement (https://asha.figshare.com/articles/dataset/_/24207864)
Supplement: Supplementary file 4 [file 1]

**Supplemental Material S2.** Stepwise changes in all outcome measures from 3 to 6 months and 6 to 12 months.
